1 **Optimised production of disulfide-bonded fungal effectors in *E. coli* using CyDisCo and**  
2 **FunCyDisCo co-expression approaches**

3

4 Daniel S. Yu<sup>1</sup>, Megan A. Outram<sup>1</sup>, Emma Crean<sup>1</sup>, Ashley Smith<sup>1</sup>, Yi-Chang Sung<sup>1</sup>, Reynaldi  
5 Darma<sup>1</sup>, Xizhe Sun<sup>1</sup>, Lisong Ma<sup>1</sup>, David A. Jones<sup>1</sup>, Peter S. Solomon<sup>1</sup>, Simon J. Williams<sup>1,§</sup>

6

7 <sup>1</sup>Research School of Biology, The Australian National University, Canberra, ACT 2601,  
8 Australia

9

10 <sup>§</sup>Corresponding author: Email: [simon.williams@anu.edu.au](mailto:simon.williams@anu.edu.au) (+61 2 6125 7862)

11

12 Keywords: Fungal effectors, Protein expression, Disulfide-rich proteins, CyDisCo, co-  
13 expression system

14

15 Funding: Australian Research Council (DP180102355, DP200100388, FT200100135,  
16 DE170101165). Australian Academy of Science (Thomas Davies Grant). Australian National  
17 University Future Scheme (35665). Australian Institute of Nuclear Science and Engineering.

18

19 **Abstract**

20 Effectors are a key part of the arsenal of plant pathogenic fungi and promote pathogen virulence  
21 and disease. Effectors typically lack sequence similarity to proteins with known functional  
22 domains and motifs, limiting our ability to predict their functions and understand how they are  
23 recognised by plant hosts. As a result, cross-disciplinary approaches involving structural  
24 biology and protein biochemistry are often required to decipher and better characterise effector  
25 function. These approaches are reliant on high yields of relatively pure protein, which often  
26 requires protein production using a heterologous expression system. For some effectors,  
27 establishing an efficient production system can be difficult, particularly those that require  
28 multiple disulfide bonds to achieve their naturally folded structure. Here, we describe the use  
29 of a co-expression system within the heterologous host *E. coli* termed CyDisCo (cytoplasmic  
30 disulfide bond formation in *E. coli*) to produce disulfide bonded fungal effectors. We  
31 demonstrate that CyDisCo and a naturalised co-expression approach termed FunCyDisCo  
32 (Fungi-CyDisCo) can significantly improve the production yields of numerous disulfide  
33 bonded effectors from diverse fungal pathogens. The ability to produce large quantities of  
34 functional recombinant protein has facilitated functional studies and crystallisation of several  
35 of these reported fungal effectors. We suggest this approach could be useful when investigating  
36 the function and recognition of a broad range of disulfide-bond containing effectors.

## 37 **Introduction**

38 Fungal pathogen infections are a leading cause of yield losses in many economically important  
39 crops. During infection and colonisation of their plant host, fungal pathogens utilise small,  
40 secreted virulence proteins, known as effectors, to promote disease (Stergiopoulos and de Wit  
41 2009). Characterised effectors have been implicated in functions that include the targeting and  
42 disruption of plant defences and nutrient acquisition from the host (Selin et al. 2016). Effectors  
43 can also be recognised by plant receptors, which activate defence pathways leading to plant  
44 immunity (Dodds and Rathjen 2010).

45 Fungal pathogens utilise 10-1000s of effectors during colonisation of plant hosts  
46 (Oliveira-Garcia and Valent 2015). Understanding how these effectors function is often  
47 challenging. Many effectors have low sequence similarity to proteins with known functional  
48 domains or motifs, preventing reliable functional predictions based on sequence alone. The  
49 most informative effector function studies often require multi-discipline approaches.

50 We are interested in understanding the structure and function of effectors from multiple  
51 plant-pathogenic fungi. Many of these are Kex2-processed pro-domain (K2PP) effectors,  
52 which include cysteine-rich effectors with thiol groups of the cysteine sidechain involved in  
53 disulfide bond formation (Outram et al. 2021). To study disulfide-bond containing effectors,  
54 we have sought to develop tools to enhance protein production in *Escherichia coli* (Zhang et  
55 al. 2017; Outram et al. 2021). To this end, we (and others), have had success using the  
56 specialised strain of *E. coli*, SHuffle® (New England Biolabs, Ipswich, Massachusetts, United  
57 States) (Maqbool et al. 2015; Zhang et al. 2017; De la Concepcion et al. 2018; Outram et al.  
58 2021). SHuffle is engineered to address unfavourable redox potential in the cytoplasm through  
59 disruption of the glutaredoxin and thioredoxin pathways, and expression of a cytoplasmic  
60 version of the disulfide bond isomerase protein, DsbC, which normally localises to the  
61 periplasm (Fig. 1A and B). These manipulations have been shown to improve production of  
62 correctly-folded disulfide-bonded proteins (Lobstein et al. 2012). We have subsequently  
63 utilised small solubility tags to further enhance disulfide-rich effector yields in SHuffle  
64 (Outram et al. 2021). Despite these advancements, the yields obtained for many of our effectors  
65 of interest have remained low and inadequate for structural and biochemical studies.

66 To address this limitation, we have sought to further improve our production system.  
67 The emergence of synthetic biology and the molecular tools that support this discipline have  
68 seen an increased interest in co-expression of eukaryotic machinery and chaperones in *E. coli*  
69 to improve recombinant protein production (Zhou et al. 2018). This approach has also been  
70 developed to enhance production of disulfide-bonded proteins. In 2014, Matos and colleagues

71 introduced the CyDisCo system (for **cytoplasmic disulfide bond formation in *E. coli***) (Matos  
72 et al. 2014). CyDisCo involves co-expression, in *E. coli*, of a disulfide-bonded protein of  
73 interest with yeast mitochondrial sulfhydryl oxidase, Erv1p, and human protein disulfide-  
74 isomerase (PDI) (Fig. 1C). To date, enhanced production of numerous disulfide-rich human  
75 proteins has been reported, including antibodies, human growth factor and perlecan (Matos et  
76 al. 2014; Gaciarz et al. 2016; Sohail et al. 2020). More recently, the CyDisCo system has been  
77 used to produce functional recombinant SARS-CoV-2 spike receptor binding domain (Prahla  
78 et al. 2021).

79 Here, we demonstrate the utility of the CyDisCo co-expression system in combination  
80 with SHuffle *E. coli* to produce disulfide-rich fungal effectors. Using this system, seven out of  
81 eight effector candidates studied were successfully purified with higher yields (ranging from  
82 2x to 29x) compared to SHuffle alone. We sought to naturalise the system further towards the  
83 production of fungal effectors by utilising a native PDI and sulfhydryl oxidase from *Fusarium*  
84 *oxysporum* f. sp. *lycopersici* (*Fol*). The naturalised system, termed FunCyDisCo, outperformed  
85 protein production using SHuffle alone and had varied, protein-dependent results, compared  
86 with CyDisCo. In our hands, the adoption of CyDisCo/FunCyDisCo has enabled the functional  
87 and structural investigation of numerous disulfide-rich effectors that could not otherwise be  
88 achieved. We suggest this approach could be broadly useful in the investigation of the function  
89 and recognition of a broad range of disulfide-bond containing effectors.

90

## 91 **Results**

### 92 **CyDisCo facilitates the improved production of SIX6 proteins from *Fusarium oxysporum***

93 We have previously demonstrated that numerous *Fol* Secreted in Xylem (SIX) effectors can  
94 be produced using the *E. coli* strain SHuffle in combination with an N-terminal GB1 (protein  
95 GB1 domain) solubility tag (Outram et al. 2021). Nevertheless, yields remained relatively low  
96 for some effectors of interest, including SIX6 (~0.3 mg/L of culture) and made structural  
97 studies difficult and laborious (Outram et al. 2021). To address this limitation, we employed  
98 CyDisCo, which involves co-expression of a sulfhydryl oxidase and PDI with the effector of  
99 interest in SHuffle *E. coli* (Fig. 1C). To understand the effectiveness of this approach, we  
100 performed side-by-side expression and purification of N-terminal 6xHis-GB1 tagged SIX6  
101 (lacking the signal peptide) in SHuffle alone or in SHuffle with CyDisCo (Fig. 2A). GB1-SIX6  
102 produced in SHuffle alone was highly expressed, however, most of the protein was insoluble.  
103 The total amount of SIX6, when co-expressed with CyDisCo was lower compared to SHuffle  
104 alone, however the total protein and soluble fraction (clarified lysate) were indistinguishable,

105 suggesting improved solubility. GB1-SIX6 expressed with and without CyDisCo was  
106 subsequently purified from the soluble fractions using nickel affinity chromatography (Fig.  
107 2B). The protein yields obtained for GB1-SIX6 with CyDisCo were greater than GB1-SIX6  
108 produced in SHuffle alone, and of higher purity as determined by SDS-PAGE analysis (Fig.  
109 2B). Purified protein obtained when SIX6 was expressed alone contained higher quantities of  
110 high molecular weight proteins consistent with the presence of heat-shock proteins compared  
111 to SIX6 co-expressed with CyDisCo. Heat-shock proteins typically assist in protein folding but  
112 can maintain associations with unfolded protein (Lesley et al. 2002). Their presence can  
113 indicate the existence of soluble aggregates of a protein of interest (in this case GB1-SIX6) and  
114 are typically a negative indicator of protein quality. We removed the GB1 fusion partner from  
115 SIX6 using 3C protease and used an additional nickel purification step to remove the GB1-tag,  
116 uncleaved protein and the 3C protease, prior to further purification by size exclusion  
117 chromatography (SEC). More mono-dispersed SIX6 protein was obtained when expressed with  
118 CyDisCo compared to SHuffle alone (Fig. 2C). The final yields were 1.5 mg/L for SIX6 co-  
119 expressed with CyDisCo, compared with 0.4 mg/L when expressed alone in this experiment.  
120 We consistently obtained higher final yields (ranging from 0.9 to 2.2 mg/L) for SIX6 co-  
121 expressed with CyDisCo compared to SIX6 expressed in SHuffle alone (from 0.2 to 0.5 mg/L)  
122 in three independent replicates of this experiment, highlighting the robustness and  
123 reproducibility of the co-expression approach. The quality of the purified SIX6 was analysed  
124 using intact protein mass spectrometry (MS) and circular dichroism (CD) spectropolarimetry,  
125 which revealed that the protein is disulfide bonded (four disulfides formed) and contains  
126 secondary structural elements dominated by  $\beta$ -sheets (Supplementary Fig. S1 and S2).

127 Several homologues of SIX6 exist in different *forma specialis* of *F. oxysporum* ranging  
128 from 60–92% similarity to SIX6 from *Fol*. Notably, all homologues of SIX6 contain conserved  
129 cysteine residues (Fig. 2D). To validate the effectiveness of the CyDisCo system for improving  
130 protein yields of SIX6, homologues of SIX6 from *Foc* (*F. oxysporum* f. sp. *cubense*) and *Fov*  
131 (*F. oxysporum* f. sp. *vasinfectum*) were expressed with and without CyDisCo, and subsequently  
132 purified (Fig. 2E and F). The co-expression of CyDisCo improved the soluble protein yield by  
133 ~5-fold for *Foc*SIX6 from 0.6 mg/L to 3.1 mg/L, and ~5-fold for *Fov*SIX6 for *Fov*SIX6 from  
134 0.04 mg/L to 0.2 mg/L, consistent with the results for *Fol*SIX6. Collectively, these data suggest  
135 that CyDisCo promotes improved disulfide-bond formation to boost yields of soluble correctly-  
136 folded SIX6 in *E. coli*.

137

138 **CyDisCo facilitates the improved production of an expanded set of disulfide-rich fungal**  
139 **effectors**

140 Based on the success observed for SIX6 we wanted to test the utility of the CyDisCo system  
141 to produce different disulfide-rich fungal effectors. The effectors chosen include SIX1 (Avr3)  
142 and SIX4 (Avr1) from *Fol*, SnTox1 and SnTox3 from *Parastagonospora nodorum*, and NIP2.1  
143 from *Rhynchosporium commune* (Supplementary Table S1). Most of these effectors could only  
144 be produced in low yields from SHuffle *E. coli* despite the addition of fusion partners (Outram  
145 et al. 2021). SIX1, SIX4 and SnTox3 were expressed with an N-terminal 6xHisGB1 tag, but  
146 GB1 was not included for SnTox1 and NIP2.1 as the tag was a similar size to the proteins of  
147 interest leading to complications during downstream analysis. Proteins expressed in SHuffle  
148 *E. coli* alone or with CyDisCo were expressed and purified (side-by-side) using the same  
149 approach described for SIX6 (details in methods) and the final mono-dispersed SEC elution  
150 fractions were compared (Fig. 3). In most cases, we observed an increase in final yields  
151 associated with co-expression with CyDisCo with a ~29-fold improvement for SIX1 resulting  
152 in a yield of 4.3 mg/L, ~6-fold improvement for SIX4 with a final yield of 2.4 mg/L, ~3-fold  
153 improvement for SnTox1 with a final yield of 1.5 mg/L and ~2.5-fold improvement for NIP2.1  
154 with a final yield of 0.15 mg/L. SnTox3 was the only protein that did not show any obvious  
155 improvement in yield when co-expressed with CyDisCo. Collectively, this demonstrates a  
156 general effectiveness of the CyDisCo co-expression system in improving the yield of multiple  
157 disulfide-rich effectors across different fungal species, with the degree of improvement being  
158 protein specific.

159

160 **A modified fungal-specific CyDisCo system for improved soluble expression of disulfide-**  
161 **rich fungal effectors**

162 The Erv1p and human PDI pair of CyDisCo was previously reported to be the most effective  
163 at increasing protein yield (Gaciarz et al. 2016). However, this system has been used  
164 predominantly to enhance the production of disulfide-rich human proteins such as antibodies,  
165 human growth factor and perlecan (Matos et al. 2014; Gaciarz et al. 2016; Sohail et al. 2020).  
166 Recently, a modified CyDisCo system was utilised to produce disulfide-rich conotoxins from  
167 cone snails, whereby an additional conotoxin-specific PDI from *Conus geographus* was  
168 included with the CyDisCo components (Nielsen et al. 2019).

169 We have shown that CyDisCo benefits the production of numerous disulfide-rich  
170 fungal effectors. Despite this advance, the yield for some effectors, such as FovSIX6, remained

171 low (0.2 mg/L) and we wanted to investigate whether the CyDisCo system could be modified  
172 and improved to benefit the production of recalcitrant disulfide-rich fungal effectors.

173 We substituted the human PDI with a PDI from *Fol*, as the amino acid sequence of  
174 human PDI is substantially divergent from fungal PDIs (Supplementary Fig. S3A). We also  
175 selected a sulfhydryl oxidase (Erv2) that localises in the endoplasmic reticulum (ER) of fungi  
176 to co-express with PDI in place of ERV1p. Erv2 is a fungal-specific membrane-bound  
177 sulfhydryl oxidase that catalyses disulfide bonds *de novo* within the ER (Sevier et al. 2001;  
178 Sevier and Kaiser 2006). When overproduced in yeast, Erv2 forms mixed disulfide bonds with  
179 yeast PDI, suggesting a transient association between the two proteins (Sevier et al. 2001). We  
180 selected Erv2 for two reasons, firstly, PDIs localise to the ER and would not interact with  
181 Erv1p-like sulfhydryl oxidases, which localise in the mitochondria (Lange et al. 2001; Ellgaard  
182 and Ruddock 2005). Secondly, the presence of signal peptides in fungal effectors indicate that  
183 they are trafficked through the ER and Golgi secretory pathway (Petre and Kamoun 2014).

184 BlastP searches of the *Fol* genome (Ma et al. 2010) using yeast PDI and Erv2 as queries,  
185 indicated that four putative PDI proteins and two Erv2-like proteins were present in *Fol*  
186 (Supplementary Fig. S3A and B). To select the most appropriate proteins for co-expression  
187 studies in *E. coli*, we made use of RNAseq data from *Fol* infections of tomato (Fig. 4A). This  
188 demonstrated that FOXG\_00140 (FolPDI) and FOXG\_09255 (FolErv2) were upregulated  
189 during infection, and these proteins were subsequently selected for expression trials (Fig. 4B).

190 To assess whether we could improve the CyDisCo system for production of disulfide-  
191 rich fungal effectors in *E. coli*, *F. oxysporum* effectors FolSIX6, FovSIX6 and SIX1 with an  
192 N-terminal 6xHisGB1 tag, and NIP2.1 from *R. commune* with an N-terminal 6xHis tag in  
193 SHuffle *E. coli* were co-expressed with either CyDisCo or the modified fungal-specific  
194 CyDisCo (FunCyDisCo) containing FolErv2 lacking the N-terminal transmembrane domain  
195 and FolPDI lacking the signal peptide (Fig. 4B), and purified them (side-by-side) using the  
196 same approaches detailed above. To confirm CyDisCo/FunCyDisCo components were  
197 expressed in a soluble form, total and clarified lysates were analysed by SDS-PAGE (Fig. 4C).  
198 For FolSIX6, the co-expression of CyDisCo or FunCyDisCo were equally effective, each  
199 resulting in a yield of ~2 mg per litre of culture, a 5-fold increase compared to SHuffle alone  
200 (Fig. 4D). FovSIX6 co-expressed with FunCyDisCo resulted in a yield of ~0.6 mg per litre of  
201 culture, a 3-fold improvement in yield compared to co-expression with CyDisCo and 15-fold  
202 improvement compared to SHuffle alone (Fig. 4E). For SIX1, co-expression with FunCyDisCo  
203 resulted in a 13-fold improvement in yield compared to SHuffle alone and a 2-fold decrease in  
204 protein yield when compared to CyDisCo (Fig. 4F). NIP2.1 co-expressed with FunCyDisCo



205 resulted in a yield of ~0.06 mg/L, which was similar to the yields obtained from SHuffle alone,  
206 but a 2.5-fold decrease compared to CyDisCo (Fig. 4G). Collectively, these results suggest the  
207 use of CyDisCo or FunCyDisCo co-expression systems can both improve yields of disulfide-  
208 rich effectors compared to SHuffle *E. coli* alone, however the choice of which system works  
209 best is protein specific.

210

### 211 **Co-expression of disulfide-rich fungal effectors in non-redox mutant *E. coli* strains**

212 We have shown the CyDisCo and FunCyDisCo co-expression systems are effective at  
213 improving yields for numerous disulfide-rich fungal effectors produced in SHuffle *E. coli*  
214 compared to SHuffle alone. In a previous report, the CyDisCo system could be used to produce  
215 disulfide-bonded antibody fragments in different *E. coli* strains (Gaciarz et al. 2016). This  
216 could allow greater flexibility in the choice of *E. coli* background for the expression of  
217 disulfide-rich effectors, which might be advantageous for different applications.

218 We therefore investigated if improvements to the yield of disulfide-rich fungal effectors  
219 can be made using the CyDisCo and FunCyDisCo systems expressed in non-redox mutant  
220 strains such as BL21(DE3). FolsIX6 lacking the signal peptide with an N-terminal 6xHisGB1  
221 tag was expressed in BL21(DE3) by itself, or co-expressed with CyDisCo or FunCyDisCo  
222 systems, and was purified simultaneously from both using nickel affinity chromatography.  
223 However, we were unable to produce high quantities of FolsIX6 with either co-expression  
224 system in BL21(DE3). We were also unable to confirm the soluble production of  
225 CyDisCo/FunCyDisCo components (Supplementary Fig. S4). Collectively, in our hands, the  
226 CyDisCo and modified FunCyDisCo systems were not transferable into BL21(DE3) *E. coli*.

227

### 228 **Recombinant SIX4 (Avr1) causes cell death in *I*-containing tomato cultivars**

229 The adoption of the CyDisCo/FunCyDisCo system has facilitated the structural elucidation of  
230 numerous fungal effectors in our lab (structures to be presented elsewhere). Here, however, we  
231 present data to show that these high-quality/purity proteins have applications outside of  
232 structural studies. Previously, we used a protein-mediated phenotyping approach to study the  
233 necrotrophic effector SnTox1 and SnTox3 in wheat (Zhang et al. 2017; Outram et al. 2021;  
234 Sung et al. 2021). Here, we were interested in determining whether the effectors produced  
235 using our enhanced production system could be used to study effector recognition. We  
236 demonstrated that purified SIX4 (Avr1) protein infiltrated into cotyledons caused cell death in  
237 a tomato cultivar that contained the *I*-resistance gene (M82). Importantly, cell death was not  
238 observed when the same protein was infiltrated into a tomato cultivar lacking *I* (MoneyMaker)



239 (Fig. 5). This demonstrates the capacity for *E. coli*-produced SIX4 (Avr1) to be recognised by  
240 the I resistance protein in the native tomato system.

241

## 242 **Discussion**

243 Here, we demonstrate that the CyDisCo co-expression strategy has the capacity to significantly  
244 increase the yield of functional disulfide-rich effectors when produced in SHuffle *E. coli*. Of  
245 the eight effectors we trialled, all could be expressed and purified using CyDisCo and seven  
246 displaying improved yields and purity compared to SHuffle alone. Our tailored FunCyDisCo  
247 outperformed SHuffle alone for the three *F. oxysporum* effectors studied, but showed effector-  
248 specific differences compared to CyDisCo.

249 The basis of the CyDisCo co-expression approach is to mimic (albeit loosely)  
250 eukaryotic secretory pathways within a prokaryotic host. PDI and sulfhydryl oxidases proteins  
251 are known to function together to assist protein folding through disulfide-bond formation and  
252 correct pairing of disulfide bonds (Sevier 2010). There is some evidence that these proteins are  
253 also important in pathogenic fungi. For example, PDI1 from *Ustilago maydis* is crucial for the  
254 correct folding of a pool of secreted disulfide-rich proteins important for virulence (Marin-  
255 Menguiano et al. 2019). We attempted to further tailor this system with the introduction of  
256 FunCyDisCo co-expression, using *Fol* PDI and Erv2 isoforms identified in RNAseq data from  
257 *Fol*-infected tomato. Our data for FunCyDisCo showed mixed success compared to CyDisCo.  
258 One potential reason for this variation is isoform specificity. In *Saccharomyces cerevisiae*,  
259 there are more than five PDI-like proteins and two sulfhydryl oxidases localised to the  
260 endoplasmic reticulum, each preferentially aiding the disulfide-bond formation of different  
261 proteins (Frand and Kaiser 1999; Norgaard et al. 2001; Sevier and Kaiser 2006). In *Fol*, four  
262 PDI and two Erv2-like homologs can be identified. While RNAseq data from host infection  
263 were used to guide our selection, it is plausible other homologs or combinations could result in  
264 better effector yields.

265 Further improvements may also be derived from the introduction of additional  
266 accessory proteins and chaperones that are not specifically involved in disulfide bond  
267 formation. For example, Lhs1, an HSP70 chaperone from *Magnaporthe oryzae* is crucial for  
268 the proper processing of secreted proteins, with *Lhs1* knockouts exhibiting lower levels of  
269 secreted effector proteins and severely reduced pathogenicity (Yi et al. 2009). Other systems  
270 involving co-expression of accessory proteins and chaperones have been successfully utilised  
271 to express complex proteins in *E. coli*, such as RuBisCo. The simultaneous co-expression of a  
272 plant chaperonin and four assembly factors has been reported to produce ~12-fold higher yields

273 of functional RuBisCo (Wilson et al. 2019). The incorporation of general accessory proteins  
274 and chaperones that aid the oxidative pathway for disulfide-bond formation may tailor the co-  
275 expression system for a given protein. However, due to the complexity of different oxidation  
276 pathways, pinpointing which proteins to co-express with a given disulfide-rich effector is  
277 difficult.

278 Eukaryotic proteins produced in a prokaryotic system often end up in inclusion bodies  
279 due to the lack of folding machinery and a rapid rate of protein synthesis preventing correct  
280 protein folding (Widmann and Christen 2000). Incorporation of eukaryotic components for co-  
281 expression in *E. coli* to mimic eukaryotic disulfide-bond formation raises the question: Why  
282 not use a eukaryotic system directly? Eukaryotic expression systems like yeast, have been used  
283 successfully to express soluble disulfide-rich effectors in quantities necessary for structural  
284 characterisation, such as AvrLm4–7 from *Leptosphaeria maculans* and Ecp6 from  
285 *Cladosporium fulvum* (Sanchez-Vallet et al. 2013; Blondeau et al. 2015). However, some  
286 disulfide-rich proteins were produced in lower quantities when expressed in yeast compared to  
287 *E. coli*, such as SnTox1, SnTox3 and ToxB (Liu et al. 2009; Liu et al. 2012; See et al. 2019;  
288 Outram et al. 2021). This demonstrates that choosing expression systems for producing  
289 disulfide-rich effectors is not a ‘one size fits all’ approach and multiple expression systems and  
290 strategies should be considered in the early stages of recombinant effector protein production.

291 With prokaryotic expression systems being cheap and accessible to many laboratories,  
292 we believe our combined strategy of SHuffle *E. coli* strain, GB1 solubility tag and CyDisCo  
293 or FunCyDisCo co-expression systems would assist the characterisation of disulfide-rich  
294 effectors from a broad range of plant pathogens.

295

## 296 **Materials and Methods**

### 297 **Vectors and gene constructs**

298 Fungal effector gene DNA sequences were codon optimised for expression in *E. coli* and  
299 synthesised by Integrated DNA Technologies (IDT, Coralville, Iowa, USA) (Supplementary  
300 Table S2). All genes were cloned into the modified, Golden Gate-compatible, pOPIN  
301 expression vector (Bentham et al. 2021). The final expression constructs contained either a N-  
302 terminal 6xHis-tag or 6xHis-GB1-tag followed by a 3C protease recognition site. The Golden  
303 Gate digestion/ligation reactions and cycling were carried out as described by Iverson et al.  
304 (2016).

305 DNA sequences that encode the yeast Erv1p and human PDI (CyDisCo) and *Fol* Erv2  
306 *Fol* PDI (FunCyDisCo) were codon optimised using the tool provided by IDT, and synthesised

307 by Twist Bioscience (San Francisco, California, USA) (Supplementary Table S2). The Yeast  
308 *Erv1p* and Human PDI pair, and *Fol* *Erv2* and *Fol* PDI pair were cloned into a modified Golden  
309 Gate compatible pACYC184 vector from the EcoFlex Kit (Moore et al. 2016), which was a  
310 gift from Paul Freemont (Addgene kit #1000000080). The Golden Gate digestion/ligation  
311 reactions and cycling were carried out as described by the kit (Moore et al. 2016). All plasmid  
312 constructs were sequence verified by sequencing.

313

### 314 **Protein expression and purification**

315 Sequence verified effector constructs (~100 ng plasmid DNA) were chemically transformed  
316 into SHuffle T7 Express C3029 (New England Biolabs (NEB), Ipswich, Massachusetts, USA)  
317 or BL21(DE3) C2527 competent *E. coli* (NEB) using the heat shock protocol provided by the  
318 manufacturer and the transformants grown on LB agar plates supplemented with ampicillin  
319 (100 µg/mL) at 37°C for 16 h. For CyDisCo/FunCyDisCo co-expression, the effector of  
320 interest and CyDisCo/FunCyDisCo constructs (~100 ng plasmid DNA) were transformed  
321 simultaneously and the transformants grown on LB agar plates supplemented with ampicillin  
322 (100 µg/mL) and chloramphenicol (35 µg/mL) at 37°C for 16 h. Colonies were used to  
323 inoculate Luria-Bertani (LB) media supplemented with required antibiotics and grown  
324 overnight at 37°C (BL21(DE3)) or 30°C (SHuffle) with shaking at 220 rpm. These small-scale  
325 overnight cultures were used to inoculate 1 L of Teriffic Broth media (24 g/L yeast extract, 12  
326 g/L tryptone, 0.5% (v/v) glycerol, 0.017 M KH<sub>2</sub>PO<sub>4</sub>, 0.072 M K<sub>2</sub>HPO<sub>4</sub>) in a 2 L baffled flask  
327 supplemented with required antibiotics and 200 µL of Antifoam 204 (Sigma-Aldrich Inc., St.  
328 Louis, Missouri, USA). Large-scale cultures were incubated at 37°C (BL21(DE3)) or 30°C  
329 (SHuffle) with shaking at 220 rpm. Cultures were induced with a final concentration of 200  
330 µM isopropyl β-D-1-thiogalactopyranoside (IPTG) once an OD<sub>600</sub> of 0.6 was reached and  
331 incubated at 16°C with shaking at 220 rpm for a further 16 h. Cells were harvested by  
332 centrifugation at 4000 xg for 10 min at 4°C. Pellets were resuspended in 50 mM HEPES pH  
333 8.0, 300 mM NaCl, 10% (v/v) glycerol, 1 mM phenylmethylsulfonyl fluoride (PMSF) and  
334 lysed by sonication using an amplitude of 40% (10 seconds on, 20 seconds off). The lysed cells  
335 were centrifuged at 20000 xg for 40 min to clarify the lysate. The protein of interest was  
336 purified further by immobilised metal affinity chromatography (IMAC) using a 5 mL HisTrap  
337 FF crude nickel column (Cytiva, Marlborough, Massachusetts, USA). The column was washed  
338 using a buffer containing 50 mM HEPES pH 8.0, 300 mM NaCl, 30 mM imidazole, prior to  
339 elution using either gradient elution or isocratic elution (dependent on the effector protein) with  
340 a buffer containing 50 mM HEPES pH 8.0, 300 mM NaCl, and 250 mM imidazole. Eluted

341 fractions were analysed by SDS-PAGE and fractions containing the protein of interest were  
342 dialysed to remove imidazole and incubated with 6xHis-tagged 3C protease (150 µg) overnight  
343 at 4°C to cleave off the N-terminal fusion from the effector proteins. Cleavage was confirmed  
344 via SDS-PAGE, and the cleaved protein of interest was separated from the N-terminal fusion  
345 tag, any uncleaved protein and 6xHis-tagged 3C protease using IMAC, and subsequently  
346 purified further by size-exclusion chromatography (SEC) using either a HiLoad 16/600 or  
347 HiLoad 26/600 Superdex 75 pg column (GE Healthcare) equilibrated with a buffer containing  
348 10 mM HEPES pH 8.0 and 150 mM NaCl. Proteins were concentrated using a 3 or 10 kDa  
349 molecular weight cut-off Amicon centrifugal concentrator (MilliporeSigma, Burlington,  
350 Massachusetts, USA), snap-frozen in liquid nitrogen and stored at -80°C for future use.

351

### 352 **Intact protein mass spectrometry (MS)**

353 Proteins were adjusted to 10 µM in 0.1% (v/v) formic acid (FA) for HPLC-MS analysis. The  
354 samples were then injected onto an Agilent UHPLC system. Each sample was first desalted for  
355 2 min on an Agilent (Santa Clara, California, USA) C3 trap column (ZORBAX StableBond  
356 C3) at a flow rate of 500 µL/min at 95% the buffer A (0.1% FA, v/v) and 5% the buffer B  
357 (0.1% FA and 100% ACN) followed by separation over 8 min using a 5–80% (v/v) gradient of  
358 buffer B at a flow rate of 500 µL/min. Eluted material was analysed using a Orbitrap Fusion™  
359 Tribrid™ mass spectrometer (Thermo Fisher Scientific, Waltham, Massachusetts, USA). MS  
360 acquisition was performed using the Intact Protein Mode script. The acquisition was performed  
361 across m/z 200-4000 with an accumulation time of 1 s. Data were analysed using the Free Style  
362 v.1.4 (Thermo Fisher Scientific) protein reconstruct tool across a mass range of m/z 500 –  
363 2000. The expected sizes of the proteins were searched.

364

### 365 **Circular dichroism (CD) spectroscopy**

366 The CD spectra of purified effectors of interest were recorded on a Chirascan spectrometer  
367 (Applied Photophysics Ltd., UK) at 20°C. Samples were diluted to 10 µM in a 20 mM sodium  
368 phosphate buffer at pH 8.0. Measurements were taken at 0.5 nm wavelength increments from  
369 190 nm or 200 nm to 260 nm at a scanning speed of 50 nm/min. A cell with a pathlength of 1  
370 mm, a bandwidth of 0.5 nm and response time of 4 s were used, with 3 accumulations. The  
371 data were averaged and corrected for buffer baseline contribution, and visualised using the  
372 webserver CAPITO tool with data smoothing (Wiedemann et al. 2013).

373

### 374 **Tomato infiltration assays**

375 Tomato seeds were sown in seed raising mix and grown in a controlled environment chamber  
376 with a 16-h day/8-h night cycle at 22°C. Purified SIX4 (Avr1) protein was diluted in water to  
377 0.1 mg/mL. Syringe infiltrations of the cotyledons of 10-d old tomato seedlings were conducted  
378 with 100 µl of protein or buffer (10 mM HEPES pH 8, 150 mM NaCl diluted 1/100).  
379 Cotyledons were harvested and imaged at 4 days post-infiltration (dpi).

380

### 381 **Acknowledgements**

382 This work was supported by the Australian Research Council (ARC; DP180102355 P.S.;  
383 DP200100388 D.J./S.W.) and the Australian Academy of Science (Thomas Davies Grant).  
384 S.W. was funded by an ARC Future Fellowship (FT200100135) and is supported by the ANU  
385 Future Scheme (35665). L.M. was funded by an ARC Discovery Early Career Researcher  
386 Award (DE170101165). E.C. and A.S. were a recipient of the AINSE Honours Scholarship  
387 Program and D.Y. holds an AINSE Postgraduate Research Award. The vectors containing  
388 CyDisCo and FunCyDisCo will be deposited with Addgene for easy access by the research  
389 community. The mass spectrometry analysis was carried out at the joint mass spectrometry  
390 facility at The Australian National University. We thank Adam J. Carrol and Joseph Boileau  
391 for their technical assistance with the mass spectrometry experiments.

392

### 393 **Literature Cited**

394 Almagro Armenteros, J.J., Tsirigos, K.D., Sonderby, C.K., Petersen, T.N., Winther, O.,  
395 Brunak, S., von Heijne, G., and Nielsen, H. 2019. SignalP 5.0 improves signal peptide  
396 predictions using deep neural networks. *Nat Biotechnol* 37:420-423.

397 Bentham, A.R., Youles, M., Mendel, M.N., Varden, F.A., Concepcion, J.C.D.I., and Banfield,  
398 M.J. 2021. pOPIN-GG: A resource for modular assembly in protein expression vectors.  
399 [bioRxiv:2021.2008.2010.455798](https://doi.org/10.1101/2021.08.20.455798).

400 Blondeau, K., Blaise, F., Graille, M., Kale, S.D., Linglin, J., Ollivier, B., Labarde, A., Lazar,  
401 N., Daverdin, G., Balesdent, M.H., Choi, D.H., Tyler, B.M., Rouxel, T., van Tilbeurgh,  
402 H., and Fudal, I. 2015. Crystal structure of the effector AvrLm4-7 of *Leptosphaeria*  
403 *maculans* reveals insights into its translocation into plant cells and recognition by  
404 resistance proteins. *Plant J* 83:610-624.

405 De la Concepcion, J.C., Franceschetti, M., Maqbool, A., Saitoh, H., Terauchi, R., Kamoun, S.,  
406 and Banfield, M.J. 2018. Polymorphic residues in rice NLRs expand binding and  
407 response to effectors of the blast pathogen. *Nat Plants* 4:576-585.

- 408 Dodds, P.N., and Rathjen, J.P. 2010. Plant immunity: towards an integrated view of plant-  
409 pathogen interactions. *Nat Rev Genet* 11:539-548.
- 410 Ellgaard, L., and Ruddock, L.W. 2005. The human protein disulphide isomerase family:  
411 substrate interactions and functional properties. *EMBO Rep* 6:28-32.
- 412 Frand, A.R., and Kaiser, C.A. 1999. Ero1p oxidizes protein disulfide isomerase in a pathway  
413 for disulfide bond formation in the endoplasmic reticulum. *Mol Cell* 4:469-477.
- 414 Gaciarz, A., Veijola, J., Uchida, Y., Saaranen, M.J., Wang, C., Horkko, S., and Ruddock, L.W.  
415 2016. Systematic screening of soluble expression of antibody fragments in the  
416 cytoplasm of *E. coli*. *Microb Cell Fact* 15:22.
- 417 Iverson, S.V., Haddock, T.L., Beal, J., and Densmore, D.M. 2016. CIDAR MoClo: Improved  
418 MoClo Assembly Standard and New *E. coli* Part Library Enable Rapid Combinatorial  
419 Design for Synthetic and Traditional Biology. *ACS Synth Biol* 5:99-103.
- 420 Lange, H., Lisowsky, T., Gerber, J., Muhlenhoff, U., Kispal, G., and Lill, R. 2001. An essential  
421 function of the mitochondrial sulfhydryl oxidase Erv1p/ALR in the maturation of  
422 cytosolic Fe/S proteins. *EMBO Rep* 2:715-720.
- 423 Lesley, S.A., Graziano, J., Cho, C.Y., Knuth, M.W., and Klock, H.E. 2002. Gene expression  
424 response to misfolded protein as a screen for soluble recombinant protein. *Protein Eng*  
425 15:153-160.
- 426 Liu, Z., Faris, J.D., Oliver, R.P., Tan, K.C., Solomon, P.S., McDonald, M.C., McDonald, B.A.,  
427 Nunez, A., Lu, S., Rasmussen, J.B., and Friesen, T.L. 2009. SnTox3 acts in effector  
428 triggered susceptibility to induce disease on wheat carrying the Snn3 gene. *PLoS*  
429 *Pathog* 5:e1000581.
- 430 Liu, Z., Zhang, Z., Faris, J.D., Oliver, R.P., Syme, R., McDonald, M.C., McDonald, B.A.,  
431 Solomon, P.S., Lu, S., Shelver, W.L., Xu, S., and Friesen, T.L. 2012. The cysteine rich  
432 necrotrophic effector SnTox1 produced by *Stagonospora nodorum* triggers  
433 susceptibility of wheat lines harboring Snn1. *PLoS Pathog* 8:e1002467.
- 434 Lobstein, J., Emrich, C.A., Jeans, C., Faulkner, M., Riggs, P., and Berkmen, M. 2012. SHuffle,  
435 a novel *Escherichia coli* protein expression strain capable of correctly folding disulfide  
436 bonded proteins in its cytoplasm. *Microb Cell Fact* 11:56.
- 437 Ma, L.J., van der Does, H.C., Borkovich, K.A., Coleman, J.J., Daboussi, M.J., Di Pietro, A.,  
438 Dufresne, M., Freitag, M., Grabherr, M., Henrissat, B., Houterman, P.M., Kang, S.,  
439 Shim, W.B., Woloshuk, C., Xie, X., Xu, J.R., Antoniw, J., Baker, S.E., Bluhm, B.H.,  
440 Breakspear, A., Brown, D.W., Butchko, R.A., Chapman, S., Coulson, R., Coutinho,  
441 P.M., Danchin, E.G., Diener, A., Gale, L.R., Gardiner, D.M., Goff, S., Hammond-



- 442 Kosack, K.E., Hilburn, K., Hua-Van, A., Jonkers, W., Kazan, K., Kodira, C.D.,  
443 Koehrsen, M., Kumar, L., Lee, Y.H., Li, L., Manners, J.M., Miranda-Saavedra, D.,  
444 Mukherjee, M., Park, G., Park, J., Park, S.Y., Proctor, R.H., Regev, A., Ruiz-Roldan,  
445 M.C., Sain, D., Sakthikumar, S., Sykes, S., Schwartz, D.C., Turgeon, B.G., Wapinski,  
446 I., Yoder, O., Young, S., Zeng, Q., Zhou, S., Galagan, J., Cuomo, C.A., Kistler, H.C.,  
447 and Rep, M. 2010. Comparative genomics reveals mobile pathogenicity chromosomes  
448 in *Fusarium*. *Nature* 464:367-373.
- 449 Maqbool, A., Saitoh, H., Franceschetti, M., Stevenson, C.E., Uemura, A., Kanzaki, H.,  
450 Kamoun, S., Terauchi, R., and Banfield, M.J. 2015. Structural basis of pathogen  
451 recognition by an integrated HMA domain in a plant NLR immune receptor. *Elife* 4.
- 452 Marin-Menguiano, M., Moreno-Sanchez, I., Barrales, R.R., Fernandez-Alvarez, A., and Ibeas,  
453 J.I. 2019. N-glycosylation of the protein disulfide isomerase Pdi1 ensures full *Ustilago*  
454 *maydis* virulence. *PLoS Pathog* 15:e1007687.
- 455 Matos, C.F., Robinson, C., Alanen, H.I., Prus, P., Uchida, Y., Ruddock, L.W., Freedman, R.B.,  
456 and Keshavarz-Moore, E. 2014. Efficient export of prefolded, disulfide-bonded  
457 recombinant proteins to the periplasm by the Tat pathway in *Escherichia coli* CyDisCo  
458 strains. *Biotechnol Prog* 30:281-290.
- 459 Moore, S.J., Lai, H.E., Kelwick, R.J., Chee, S.M., Bell, D.J., Polizzi, K.M., and Freemont, P.S.  
460 2016. EcoFlex: A Multifunctional MoClo Kit for *E. coli* Synthetic Biology. *ACS Synth*  
461 *Biol* 5:1059-1069.
- 462 Nielsen, L.D., Foged, M.M., Albert, A., Bertelsen, A.B., Soltoft, C.L., Robinson, S.D.,  
463 Petersen, S.V., Purcell, A.W., Olivera, B.M., Norton, R.S., Vasskog, T., Safavi-  
464 Hemami, H., Teilum, K., and Ellgaard, L. 2019. The three-dimensional structure of an  
465 H-superfamily conotoxin reveals a granulin fold arising from a common ICK cysteine  
466 framework. *J Biol Chem* 294:8745-8759.
- 467 Norgaard, P., Westphal, V., Tachibana, C., Alsoe, L., Holst, B., and Winther, J.R. 2001.  
468 Functional differences in yeast protein disulfide isomerases. *J Cell Biol* 152:553-562.
- 469 Oliveira-Garcia, E., and Valent, B. 2015. How eukaryotic filamentous pathogens evade plant  
470 recognition. *Curr Opin Microbiol* 26:92-101.
- 471 Outram, M.A., Sung, Y.C., Yu, D., Dagvadorj, B., Rima, S.A., Jones, D.A., Ericsson, D.J.,  
472 Sperschneider, J., Solomon, P.S., Kobe, B., and Williams, S.J. 2021. The crystal  
473 structure of SnTox3 from the necrotrophic fungus *Parastagonospora nodorum* reveals  
474 a unique effector fold and provides insight into Snn3 recognition and pro-domain  
475 protease processing of fungal effectors. *New Phytol*.

- 476 Petre, B., and Kamoun, S. 2014. How do filamentous pathogens deliver effector proteins into  
477 plant cells? *PLoS Biol* 12:e1001801.
- 478 Prahlad, J., Struble, L.R., Lutz, W.E., Wallin, S.A., Khurana, S., Schnaubelt, A., Broadhurst,  
479 M.J., Bayles, K.W., and Borgstahl, G.E.O. 2021. CyDisCo production of functional  
480 recombinant SARS-CoV-2 spike receptor binding domain. *Protein Sci*.
- 481 Sanchez-Vallet, A., Saleem-Batcha, R., Kombrink, A., Hansen, G., Valkenburg, D.J.,  
482 Thomma, B.P., and Mesters, J.R. 2013. Fungal effector Ecp6 outcompetes host immune  
483 receptor for chitin binding through intrachain LysM dimerization. *Elife* 2:e00790.
- 484 See, P.T., Iagallo, E.M., Oliver, R.P., and Moffat, C.S. 2019. Heterologous Expression of the  
485 *Pyrenophora tritici-repentis* Effector Proteins ToxA and ToxB, and the Prevalence of  
486 Effector Sensitivity in Australian Cereal Crops. *Front Microbiol* 10:182.
- 487 Selin, C., de Kievit, T.R., Belmonte, M.F., and Fernando, W.G. 2016. Elucidating the Role of  
488 Effectors in Plant-Fungal Interactions: Progress and Challenges. *Front Microbiol* 7:600.
- 489 Sevier, C.S. 2010. New insights into oxidative folding. *J Cell Biol* 188:757-758.
- 490 Sevier, C.S., and Kaiser, C.A. 2006. Conservation and diversity of the cellular disulfide bond  
491 formation pathways. *Antioxid Redox Signal* 8:797-811.
- 492 Sevier, C.S., Cuzzo, J.W., Vala, A., Aslund, F., and Kaiser, C.A. 2001. A flavoprotein oxidase  
493 defines a new endoplasmic reticulum pathway for biosynthetic disulphide bond  
494 formation. *Nat Cell Biol* 3:874-882.
- 495 Sohail, A.A., Gaikwad, M., Khadka, P., Saaranen, M.J., and Ruddock, L.W. 2020. Production  
496 of Extracellular Matrix Proteins in the Cytoplasm of *E. coli*: Making Giants in Tiny  
497 Factories. *Int J Mol Sci* 21.
- 498 Stergiopoulos, I., and de Wit, P.J. 2009. Fungal effector proteins. *Annu Rev Phytopathol*  
499 47:233-263.
- 500 Sung, Y.C., Outram, M.A., Breen, S., Wang, C., Dagvadorj, B., Winterberg, B., Kobe, B.,  
501 Williams, S.J., and Solomon, P.S. 2021. PR1-mediated defence via C-terminal peptide  
502 release is targeted by a fungal pathogen effector. *New Phytol* 229:3467-3480.
- 503 Widmann, M., and Christen, P. 2000. Comparison of folding rates of homologous prokaryotic  
504 and eukaryotic proteins. *J Biol Chem* 275:18619-18622.
- 505 Wiedemann, C., Bellstedt, P., and Grolach, M. 2013. CAPITO--a web server-based analysis  
506 and plotting tool for circular dichroism data. *Bioinformatics* 29:1750-1757.
- 507 Wilson, R.H., Thieulin-Pardo, G., Hartl, F.U., and Hayer-Hartl, M. 2019. Improved  
508 recombinant expression and purification of functional plant Rubisco. *FEBS Lett*  
509 593:611-621.

- 510 Yi, M., Chi, M.H., Khang, C.H., Park, S.Y., Kang, S., Valent, B., and Lee, Y.H. 2009. The ER  
511 chaperone LHS1 is involved in asexual development and rice infection by the blast  
512 fungus *Magnaporthe oryzae*. *Plant Cell* 21:681-695.
- 513 Zhang, X., Nguyen, N., Breen, S., Outram, M.A., Dodds, P.N., Kobe, B., Solomon, P.S., and  
514 Williams, S.J. 2017. Production of small cysteine-rich effector proteins in *Escherichia*  
515 *coli* for structural and functional studies. *Mol Plant Pathol* 18:141-151.
- 516 Zhou, Y., Lu, Z., Wang, X., Selvaraj, J.N., and Zhang, G. 2018. Genetic engineering  
517 modification and fermentation optimization for extracellular production of recombinant  
518 proteins using *Escherichia coli*. *Appl Microbiol Biotechnol* 102:1545-1556.
- 519
- 520

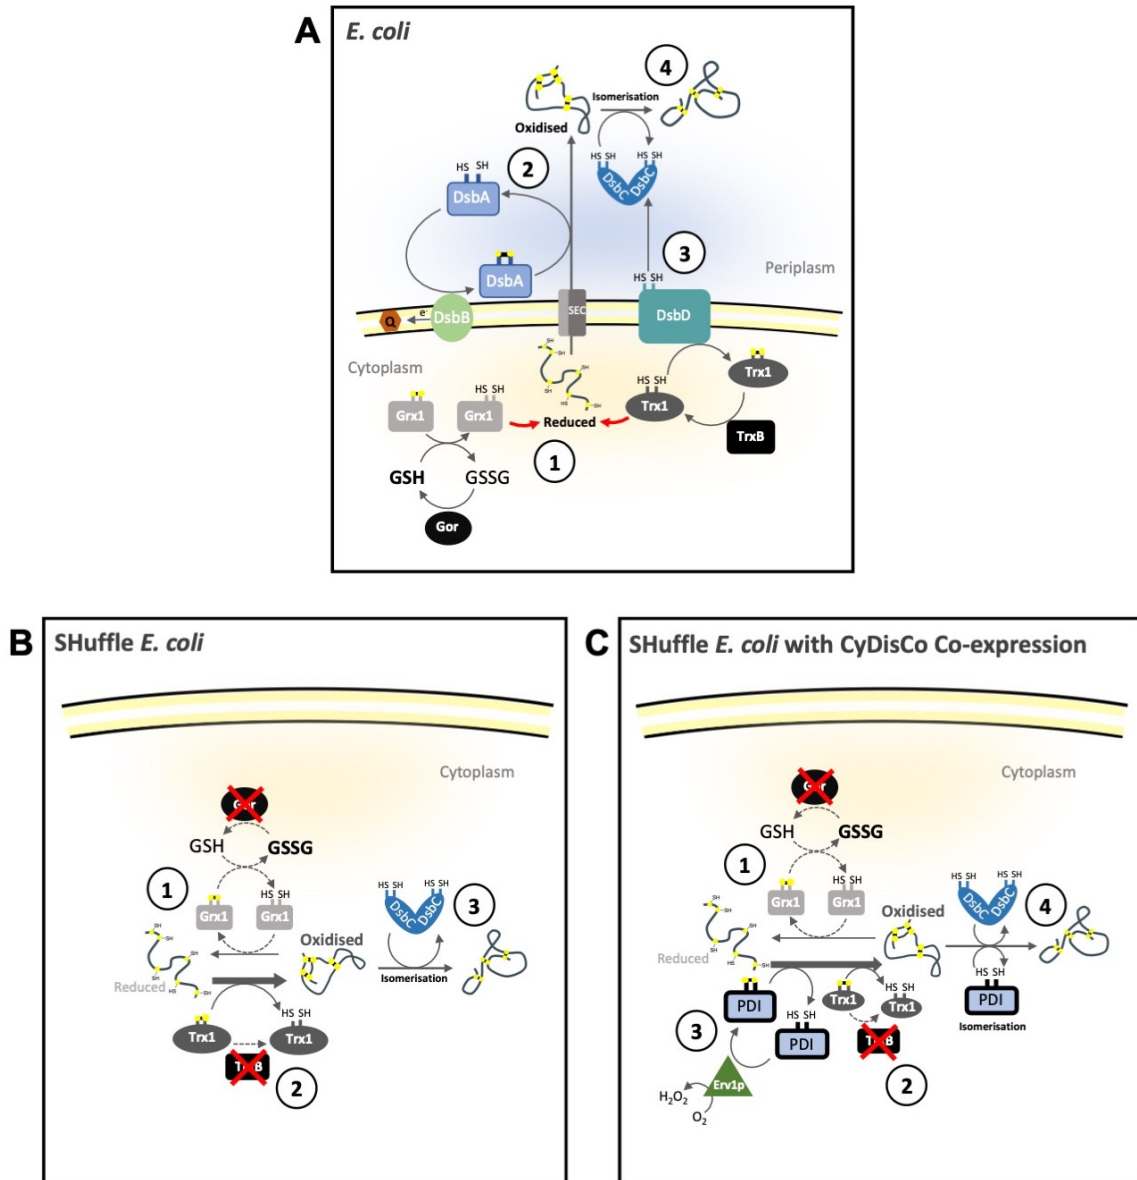

521

522

523 **Fig. 1. Disulfide bond formation in *Escherichia coli* expression systems.** (A) In wild-type  
 524 *E. coli*, proteins are produced in the cytoplasm in a reduced state. 1: The cytoplasm is a  
 525 reducing environment. Contributing factors include the high reduced glutathione (GSH):  
 526 oxidised glutathione (GSSG) ratio maintained by glutathione reductase (Gor). Excess GSH  
 527 reduces glutaredoxin-1 (Grx1), which can then reduce nascent proteins. Proteins in the  
 528 cytoplasm can also be reduced by thioredoxin-1 (Trx1), which maintains its reducing power  
 529 by thioredoxin reductase (TrxB). 2: Newly translated proteins are transported out of the  
 530 cytoplasm into the periplasm where they are oxidised by DsbA. The oxidative power of DsbA  
 531 is regenerated by DsbB. Electrons are accepted by ubiquinone (Q) and carried to the electron

532 transport chain. 3: Oxidised proteins may be incorrectly disulfide-bonded but can be isomerised  
533 by DsbC. For isomerisation to occur, DsbC needs to be in a reduced or hemi-reduced state  
534 which is maintained by DsbD. The redox state of DsbD is reset by cytoplasmic Trx1. 4: Once  
535 DsbC is in a reduced state, it can isomerise the disulfide bonds on the oxidised protein resulting  
536 in correct disulfide-bonding. **(B)** In SHuffle *E. coli* (Lobstein et al. 2012), the redox state of  
537 the cytoplasm is altered to be more oxidising. 1: The cytoplasm of SHuffle has a lower GSH:  
538 GSSG ratio due to the Gor knockout weakening the reduction pathway. 2: TrxB knockout  
539 prevents the reduction of Trx1, which is usually maintained to reset the redox state of DsbD.  
540 In conjunction with a weaker reduction pathway, the higher proportion of oxidised Trx1  
541 strengthens the oxidation pathway and newly translated proteins can be oxidised in the  
542 cytoplasm. 3: Newly oxidised proteins in the cytoplasm may be incorrectly disulfide-bonded.  
543 SHuffle *E. coli* is engineered to cytoplasmically express DsbC, which can isomerise oxidised  
544 proteins in the cytoplasm. **(C)** CyDisCo co-expression in SHuffle *E. coli* further strengthens  
545 the oxidation pathway in the cytoplasm. 1: The Gor knockout and 2: TrxB knockout in SHuffle  
546 *E. coli* weakens the reduction pathway and strengthens the oxidation pathway, respectively. 3:  
547 CyDisCo co-expression of protein disulfide isomerase (PDI) readily oxidised newly translate  
548 proteins in the cytoplasm. The redox state of PDI is reset by the sulfhydryl oxidase, Erv1p,  
549 which generates *de novo* disulfide bonds by donating electrons on to O<sub>2</sub>. Erv1p can also oxidise  
550 proteins further strengthening the oxidation pathway. 4: Incorrectly disulfide-bonded proteins  
551 are isomerised by cytoplasmically expressed DsbC, from SHuffle, and PDI from CyDisCo.

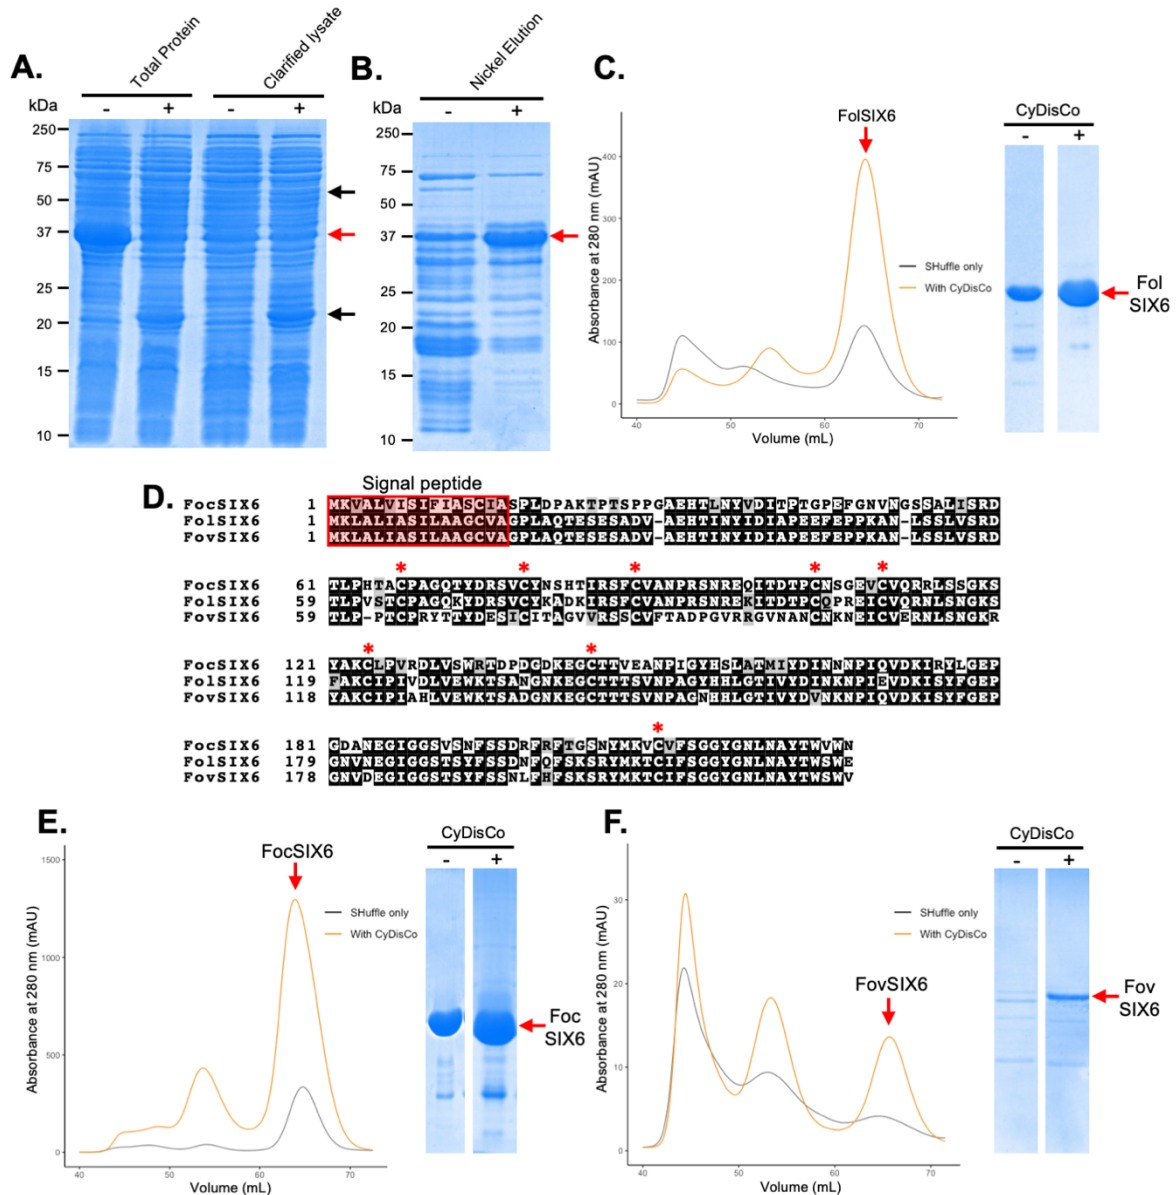

552

553

554 **Fig. 2. Recombinant SIX6 protein can be produced in SHuffle *E. coli* alone but yields are**

555 **higher when co-expressed with CyDisCo. (A)** Coomassie-stained SDS-PAGE gel showing

556 total protein and soluble proteins from SHuffle *E. coli* expressing 6xHisGB1-FolSIX6 with (+)

557 or without (-) CyDisCo co-expression. The red arrow points to the FolSIX6 (with N-terminal

558 6xHisGB1) protein band of ~37 kDa. The black arrows point to the expression of soluble PDI

559 (~55 kDa) and Erv1p (~21 kDa). (B) Coomassie-stained SDS-PAGE gel showing the proteins

560 captured by immobilised metal affinity chromatography (IMAC) from SHuffle *E. coli*

561 expressing 6xHisGB1-FolSIX6 with (+) or without (-) CyDisCo co-expression, with the red

562 arrow indicating 6xHisGB1-FolSIX6. (C) Left panel: Size-exclusion chromatograms (SEC) of

563 FolSIX6 protein produced by SHuffle *E. coli*, following cleavage by 3C protease to remove



564 the N-terminal 6xHisGB1 fusion. Shown in orange is FolsIX6 produced in SHuffle with  
565 CyDisCo co-expression and in black is FolsIX6 produced in SHuffle alone. The red arrow  
566 points to the peak corresponding to FolsIX6. Right panel: Coomassie-stained SDS-PAGE gel  
567 showing equal volume loading of FolsIX6 protein (indicated by red arrow) expressed with (+)  
568 or without (-) CyDisCo corresponding to the protein peak from SEC. **(D)** Sequence alignment  
569 of FolsIX6 and two SIX6 homologues from *F. oxysporum* f. sp. *cubense* (Foc) and *F.*  
570 *oxysporum* f. sp. *vasinfectum* (Fov). The signal peptide is highlighted in red, as determined by  
571 SignalP (Almagro Armenteros et al. 2019). Conserved cysteine residues are marked with a red  
572 asterisk. Size-exclusion chromatogram and SDS-PAGE analysis for **(E)** FocSIX6 and **(F)**  
573 FovSIX6 produced with (orange trace) or without (black trace) CyDisCo co-expression, as  
574 presented in **(C)**.

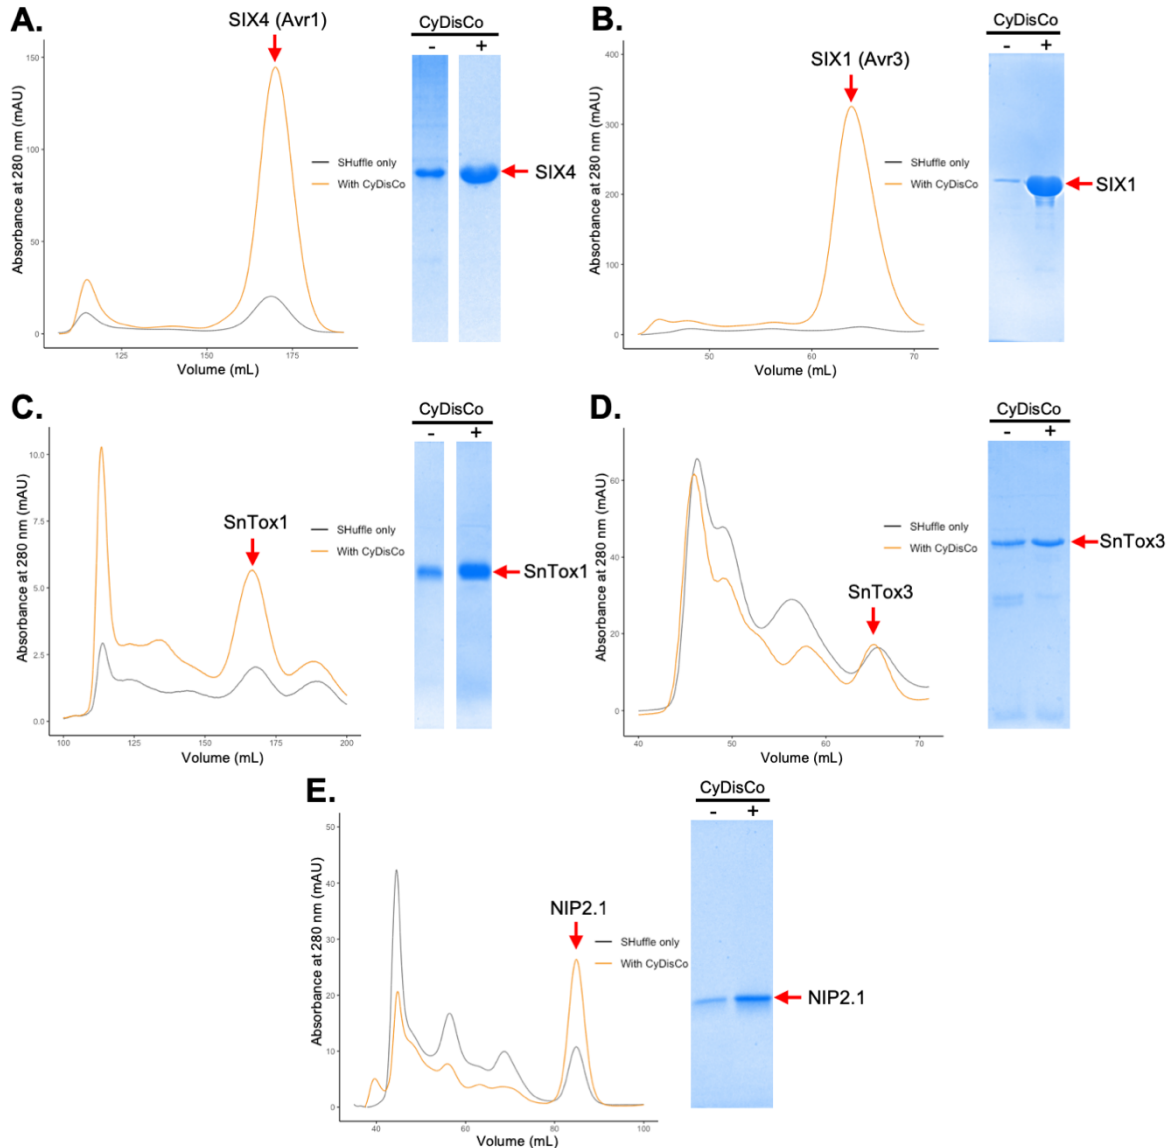

575

576

577 **Fig. 3. CyDisCo co-expression in SHuffle *E. coli* can be used effectively to produce various**  
578 **disulfide-bonded fungal effector proteins.** Left panel: Size-exclusion chromatograms (SEC)  
579 of effectors produced in SHuffle *E. coli*, following cleavage by 3C protease to remove their N-  
580 terminal fusions, with CyDisCo co-expression (orange) or without (black). The red arrow  
581 indicates the peak corresponding to the effector of interest. Right panel: Coomassie-stained  
582 SDS-PAGE gel showing equal volume loading of effector of interest (indicated by red arrow)  
583 expressed with (+) or without (-) CyDisCo corresponding to the protein peak from SEC.  
584 Chosen effectors are (A) SIX4 (Avr1) and (B) SIX1 (Avr3) from *Fusarium oxysporum* f. sp.  
585 *lycopersici* and (C) SnTox1 and (D) SnTox3 from *Parastagonospora nodorum*, and (E) NIP2.1  
586 from *Rhynchosporium commune*.

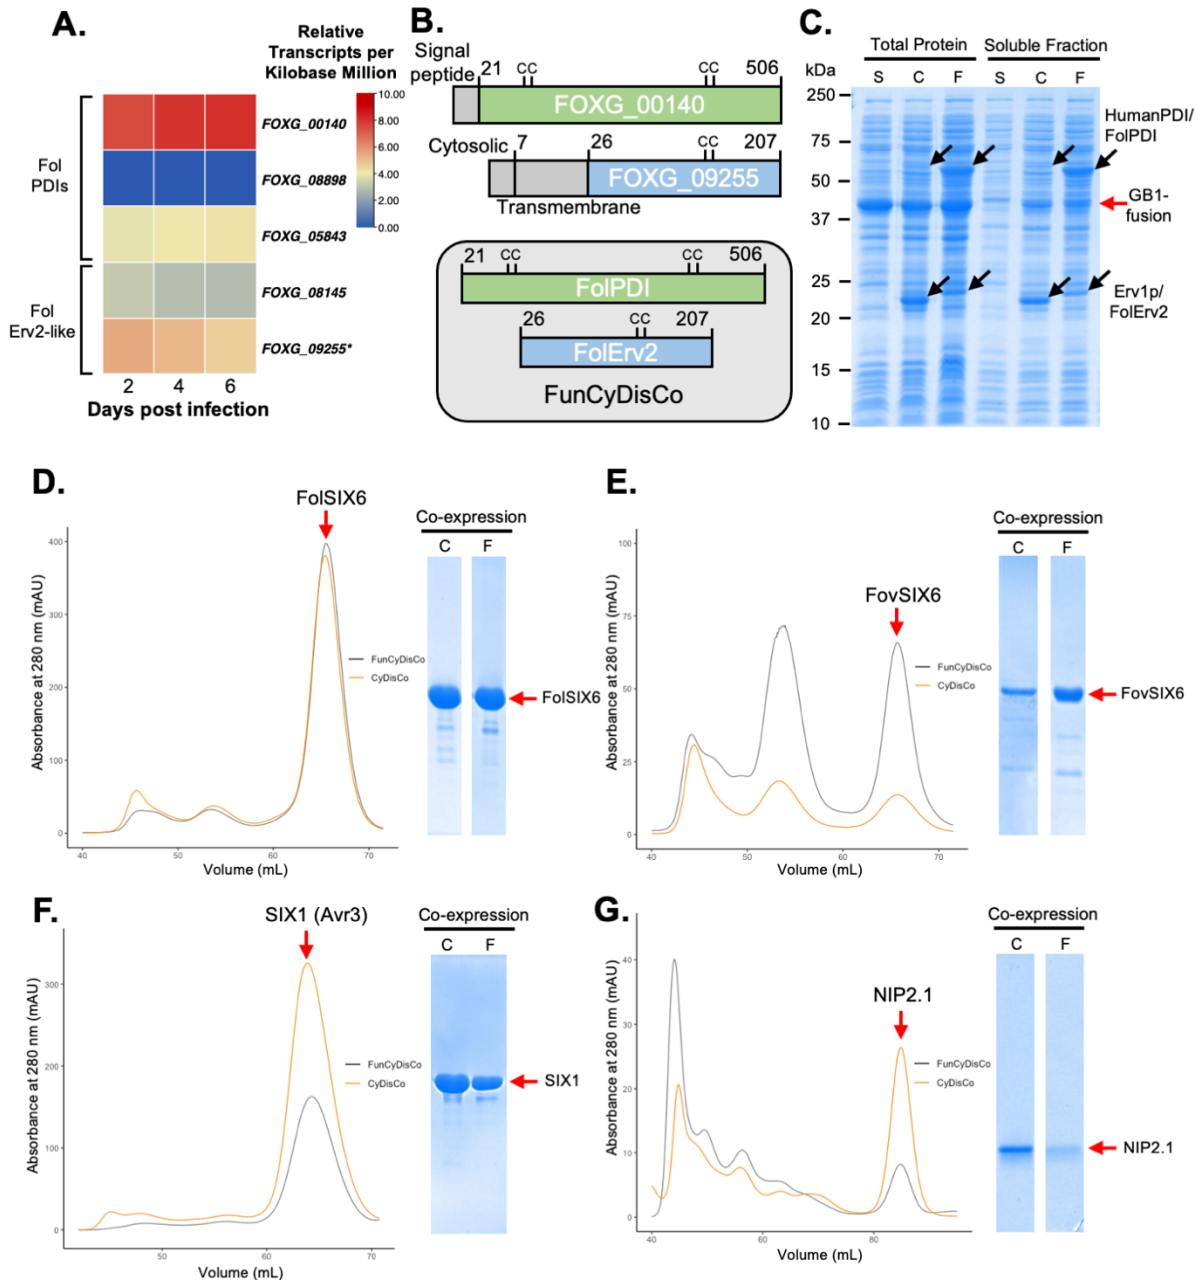

587

588

589 **Fig. 4. A fungal-specific CyDisCo system (FunCyDisCo) further improves yields of some**  
 590 **effectors. (A)** RNAseq analysis of *Fusarium oxysporum* f. sp. *lycopersici* protein disulfide  
 591 isomerases (PDIs) and sulfhydryl oxidases (Erv2-like) during Fol infection of tomato.  
 592 Transcripts of Fol PDIs (FOXP\_00140, FOXP\_08898, FOXP\_05843) and sulfhydryl  
 593 oxidases (FOXP\_08145, FOXP\_09255) measured at 2, 4 and 6 days post infection are shown.  
 594 Relative scale represents Transcripts Per Kilobase Million (TPM) with values ranging from 0  
 595 to 281 TPM. **(B)** Schematic of selected components of FunCyDisCo (top panel) and domains  
 596 that are expressed (bottom panel). **(C)** Representation of total protein and soluble fractions  
 597 following expression of a GB1-fusion-effector of interest with the CyDisCo (C) or

598 FunCyDisCo (F) co-expression systems, or SHuffle alone (S). Black arrows indicate  
599 overexpression of PDI or sulfhydryl oxidase components. Size-exclusion chromatogram and  
600 SDS-PAGE analysis of the *Fusarium oxysporum* effectors **(D)** FolsIX6, **(E)** FovSIX6, **(F)**  
601 SIX1(Avr3) and **(G)** *Rhynchosporium commune* effector NIP2.1 recombinant proteins co-  
602 expressed with CyDisCo (C) or FunCyDisCo (F). Red arrows indicate the protein of interest  
603 peak on the size-exclusion chromatogram and band on SDS-PAGE gel.  
604 \*FOXG\_09255 was incorrectly annotated. The FOXG\_09255 sequence has been corrected  
605 based on RNASeq data and can be found in Supplementary Table S2.

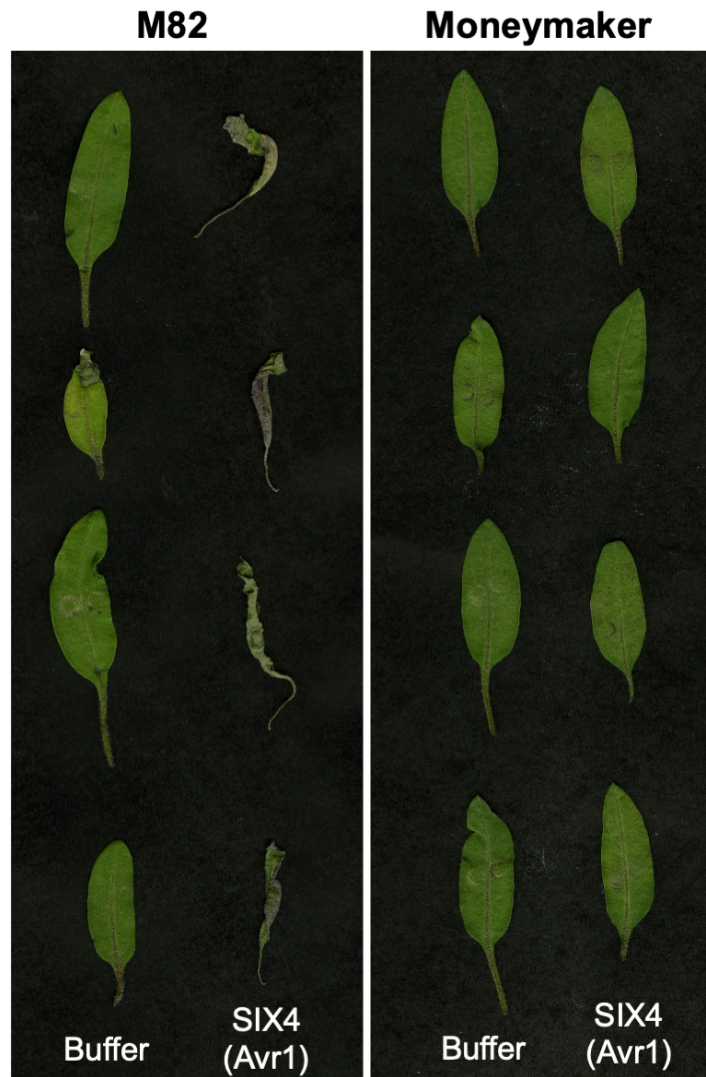

606

607 **Fig. 5. *Escherichia coli*-produced SIX4 (Avr1) causes cell death when infiltrated into**  
608 **tomato cultivars containing the resistance gene *I*.** SIX4 (Avr1) (at a concentration of 100  
609  $\mu\text{g}/\text{mL}$ ) and a buffer control were syringe-infiltrated into 10-day old tomato cotyledons from  
610 cultivars M82 (containing *I*) and MoneyMaker (lacking *I*). Cotyledons were harvested and  
611 imaged 4 days post infiltration.

612
